# Supplementary material
Source: HighWire-hosted journal article supplement (https://www.jneurosci.org/highwire/filestream/602147/field_highwire_adjunct_files/0/Supplemental_Figures.pdf)
Supplement: Supplemental_Figures.pdf [file Supplemental_Figures.pdf]

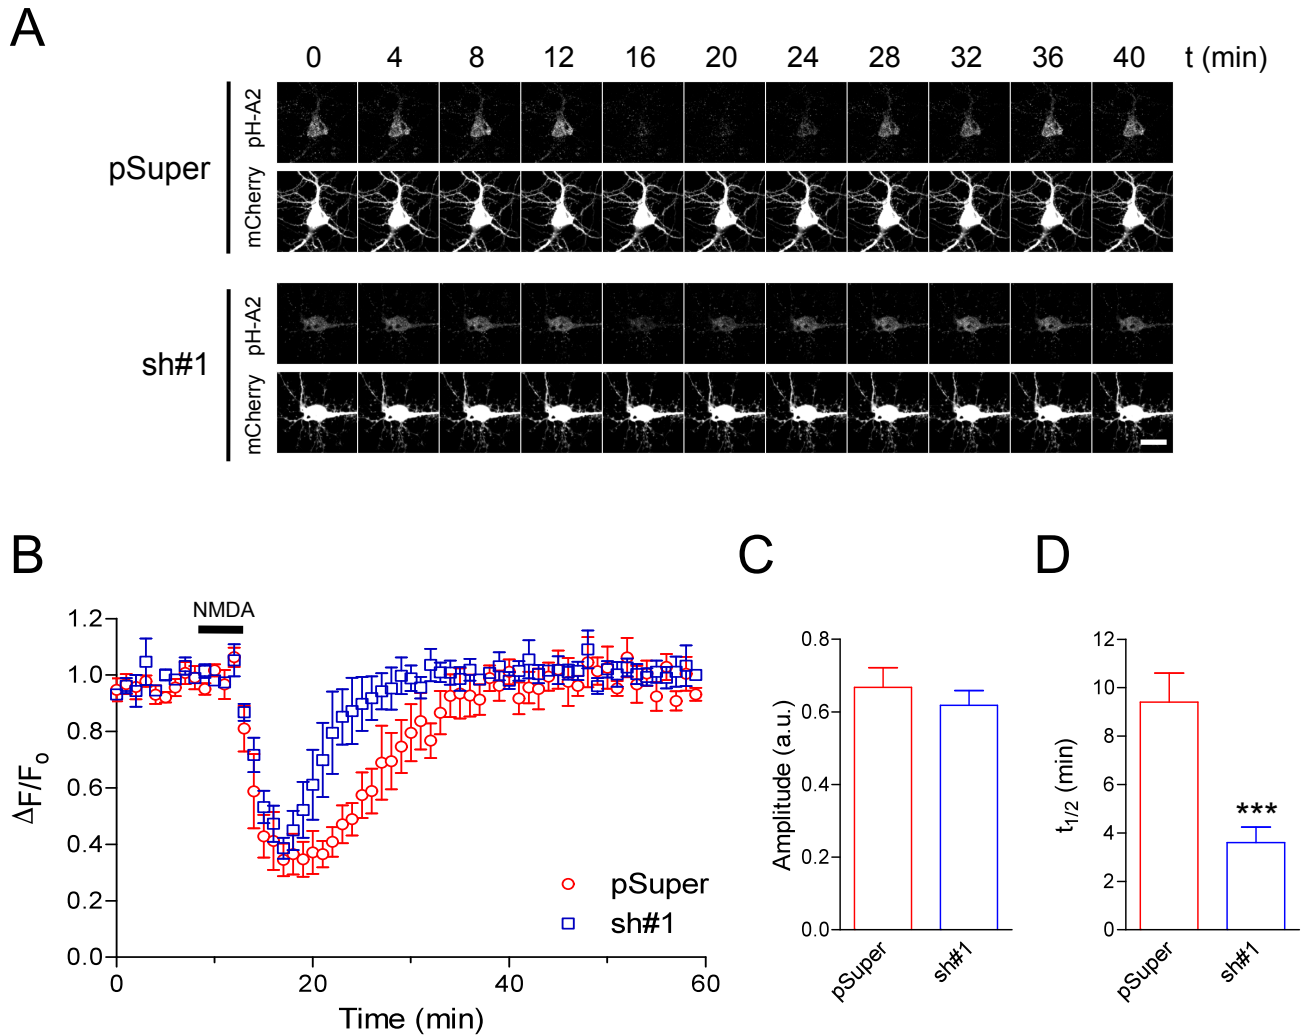

**Supplementary Figure 1.** *PICK1* knockdown accelerates the rate of GluA2 recycling upon NMDA stimulation. Cultured hippocampal neurons were transfected with either pSuper-Venus or pSuper-Venus::*PICK1* shRNA together with pH-sensitive GFP-GluA2 (pH-GluA2) reporter and mCherry at DIV15. At DIV17, neurons were stimulated with 20  $\mu$ M NMDA for 3 min and changes in pH-GluA2 fluorescence were monitored by live-cell confocal microscopy. A. Representative series of images from control and *PICK1* knockdown neurons. Scale bar, 10  $\mu$ m. B. Average time course of pH-GluA2 fluorescence change ( $\Delta F$ ) normalized to initial fluorescence ( $F_0$ ). Quantification of the amplitude of pH-GluA2 fluorescence change (C) and its recycling rate,  $t_{1/2}$  (D) in response to NMDA stimulation and after NMDA washout, respectively. Data represent mean  $\pm$  S.E.M. (Student's *t*-test, \*\*\*  $P < 0.001$ ,  $n = 4$ ).

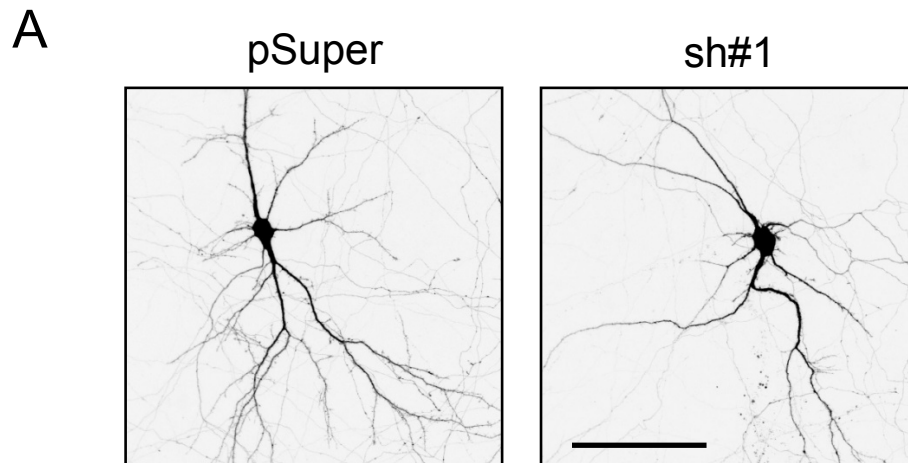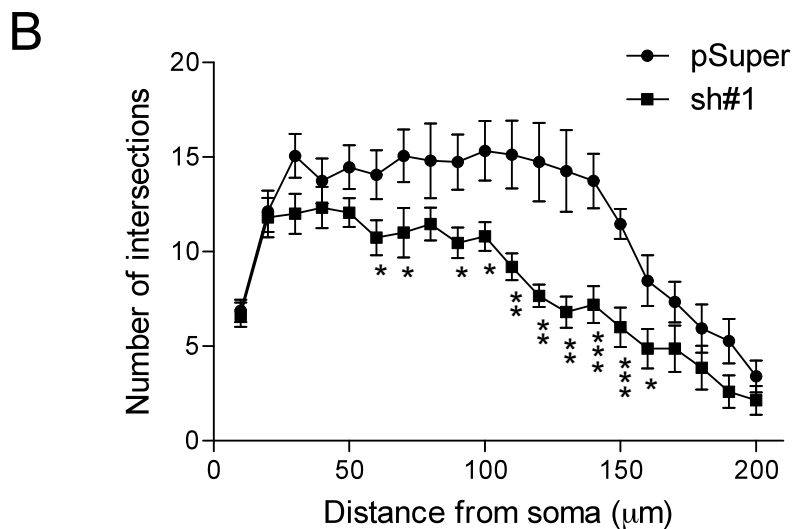

**Supplementary Figure 2.** *PICK1* knockdown disrupts dendritic morphology in developing neurons . A. Cultured cortical neurons were transfected with either pSuper-Venus or pSuper-Venus::*PICK1* shRNA at DIV8 and imaged at DIV11. Scale bar, 100 μm. B. Sholl analysis for control and *PICK1* knockdown neurons. Concentric circles with increasing radii were superimposed on Venus fluorescence images of neurons and the number of processes crossing each radius was counted. Data represent mean ± S.E.M. (Student's *t*-test, \*  $P < 0.05$ ; \*\*  $P < 0.01$ ; \*\*\*  $P < 0.001$ ,  $n = 15$ ).
